# Supplementary material for: Vertical distribution of black carbon and its mixing state in the urban boundary layer in summer
Source: Copernicus journal article supplement (doi:10.5194/acp-23-7225-2023), 2023-06-30
Supplement: Supplementary file 1 [file acp-23-7225-2023-supplement.pdf]

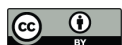

*Supplement of*

## **Vertical distribution of black carbon and its mixing state in the urban boundary layer in summer**

**Hang Liu et al.**

*Correspondence to:* Xiaole Pan (panxiaole@mail.iap.ac.cn)

The copyright of individual parts of the supplement might differ from the article licence.

**Table S1 Timetable of the vertical profile measurement**

| Date | Ascending start time | Ascending time | start | Descending start time | start | Descending end time |
|------|----------------------|----------------|-------|-----------------------|-------|---------------------|
| 6/15 | 14:01                | 14:25          |       | 15:01                 |       | 15:31               |
| 6/17 | 7:04                 | 7:34           |       | 8:15                  |       | 8:45                |
| 6/17 | 18:03:16             | 18:33:39       |       | 19:15:33              |       | 19:45:47            |
| 6/17 | 22:00                | 22:30:30       |       | 23:00:05              |       | 23:30:25            |
| 6/18 | 7:00                 | 7:31           |       | 8:15                  |       | 8:45:25             |
| 6/18 | 11:00                | 11:30:38       |       | 12:16:20              |       | 12:46:40            |
| 6/18 | 18:00                | 18:30:30       |       | 19:15:02              |       | 19:45:20            |
| 6/24 | 18:00:15             | 18:30:40       |       | 19:15:07              |       | 19:45:22            |
| 6/24 | 22:00:05             | 22:30          |       | 23:15                 |       | 23:45               |
| 6/25 | 7:00                 | 7:30:30        |       | 8:15                  |       | 8:45:22             |
| 6/25 | 11:00                | 11:30:37       |       | 12:15:15              |       | 12:46               |
| 6/25 | 18:00                | 18:30:22       |       | 19:15                 |       | 19:45:25            |
| 6/27 | 18:30:15             | 19:00:45       |       | 19:45                 |       | 20:15:20            |
| 6/27 | 22:00:50             | 22:31:15       |       | 23:14:40              |       | 23:45:30            |
| 6/28 | 11:00                | 11:30:30       |       | 12:15:09              |       | 12:45:22            |
| 6/28 | 18:00:01             | 18:30:23       |       | 19:15:04              |       | 19:45:28            |
| 6/29 | 11:00:03             | 11:30:30       |       | 12:15:03              |       | 12:45:20            |
| 6/29 | 18:00:05             | 18:30:25       |       | 19:15:05              |       | 19:45:20            |
| 6/29 | 22:06:10             | 22:36:40       |       | 23:21                 |       | 23:51               |
| 6/30 | 7:00:05              | 7:30:25        |       | 8:15:05               |       | 8:45:30             |
| 6/30 | 10:59:55             | 11:30:30       |       | 12:15                 |       | 12:45:16            |
| 6/30 | 18:00                | 18:30:20       |       | 19:15                 |       | 19:45:40            |
| 7/1  | 11:00                | 11:30:24       |       | 12:15                 |       | 12:45:12            |
| 7/1  | 18:00                | 18:30:23       |       | 19:50                 |       | 20:15:00            |
| 7/1  | 22:00                | 22:30:28       |       | 23:15                 |       | 23:45:22            |
| 7/2  | 7:00                 | 7:30:32        |       | 8:15:04               |       | 8:45:30             |
| 7/2  | 11:00                | 11:30:30       |       | 12:15:04              |       | 12:45:30            |
| 7/2  | 18:00                | 18:30:32       |       | 19:15                 |       | 19:45:25            |
| 7/2  | 22:00                | 22:30:30       |       | 23:15                 |       | 12:45:30            |
| 7/7  | 7:04                 | 7:34:40        |       | 8:18:11               |       | 8:48:50             |
| 7/7  | 11:02:16             | 11:32:45       |       | 12:17:06              |       | 12:47:30            |
| 7/7  | 18:00                | 18:30:30       |       | 19:15                 |       | 19:45:20            |
| 7/7  | 22:00                | 22:30:40       |       | 23:15                 |       | 23:45:30            |
| 7/8  | 7:00:29              | 7:30:48        |       | 8:15:05               |       | 8:45:32             |
| 7/8  | 11:00:11             | 11:30:41       |       | 12:15:10              |       | 12:45:40            |
| 7/8  | 18:00:00             | 18:30:25       |       | 19:15:10              |       | 19:45:25            |
| 7/8  | 22:00:00             | 22:30:23       |       | 23:15:05              |       | 23:45:25            |
| 7/9  | 11:00:00             | 11:30:30       |       | 12:15:00              |       | 12:45:25            |
| 7/9  | 18:00:02             | 18:30:32       |       | 19:15                 |       | 19:45:30            |
| 7/9  | 22:00:03             | 22:30:35       |       | 22:46:00              |       | 23:16:35            |
| 7/10 | 11:00                | 11:30:28       |       | 12:15                 |       | 12:45:25            |
| 7/10 | 18:00                | 18:30:26       |       | 19:15                 |       | 19:45:30            |
| 7/10 | 22:00                | 22:30:26       |       | 23:15                 |       | 23:45:20            |
| 7/11 | 6:00:00              | 06:30:25       |       | 07:15:02              |       | 7:45                |
| 7/11 | 11:00:00             | 11:30:26       |       | 12:15:05              |       | 12:45:30            |
| 7/11 | 18:00:00             | 18:30:23       |       | 19:15:06              |       | 19:42:00            |
| 7/12 | 22:00:00             | 22:30          |       | 23:15                 |       | 23:45               |
| 7/13 | 6:00:02              | 6:30:30        |       | 7:15:02               |       | 7:45:30             |
| 7/13 | 11:00:02             | 11:30:30       |       | 12:15:02              |       | 12:45:30            |
| 7/13 | 22:00:02             | 22:30:30       |       | 23:15:10              |       | 23:45:42            |
| 7/14 | 8:00                 | 8:30:30        |       | 9:15                  |       | 9:45:30             |
| 7/14 | 11:00                | 11:30:30       |       | 12:15:05              |       | 12:45:24            |
| 7/14 | 22:00                | 22:30:33       |       | 23:15:00              |       | 23:45:20            |
| 7/15 | 6:00                 | 6:30:25        |       | 7:15                  |       | 7:45:46             |

---

|      |          |          |          |          |
|------|----------|----------|----------|----------|
| 7/15 | 11:03:40 | 11:34:00 | 12:15:00 | 12:45:20 |
| 7/15 | 22:00:05 | 22:30:25 | 23:15:00 | 23:45:20 |

---

**Table S2 Brief summarize of vertical measurement about BC and its mixing state**

| Measurement area        | Measurement description                            | BC conc.                                                                                                          | BC core distribution                                                              | Size | Coating thickness                                                          | Reference                                                       |
|-------------------------|----------------------------------------------------|-------------------------------------------------------------------------------------------------------------------|-----------------------------------------------------------------------------------|------|----------------------------------------------------------------------------|-----------------------------------------------------------------|
| Europe                  | Aircraft measurement (0-1000m), EUCAARI campaign.  | ~6-200 ng/m <sup>3</sup> , decreasing with altitude.                                                              | With MMD of 150-210 nm, decreasing with altitude.                                 | -    | -                                                                          | (Ding et al., 2019)                                             |
| Rural Beijing           | Aircraft measurement (0- 3000m).                   | ~50-3000 ng/m <sup>3</sup> , decreasing with altitude.                                                            | With MMD of 160-230 nm, the vertical profile of MMD varied from cases.            | -    | Higher coating thickness in the boundary layer under pollution conditions. | (Ding et al., 2019;Zhao et al., 2020)                           |
| Arctic                  | Aircraft measurement (0.1-5500m), NETCARE campaign | 1.4-50 ng/m <sup>3</sup> , generally decreasing with altitude, but existing concentration peaks at certain height | With MMD of 130-200 nm, decreasing with altitude in Spring but uniform in summer. | -    | -                                                                          | (Schulz et al., 2019)                                           |
| Europe to North America | Aircraft measurement 2-20km)                       | 1-40 ng/m <sup>3</sup> , decreasing with altitude                                                                 | -                                                                                 | -    | Significant coating thickness increase during plume affected period        | (Ditas et al., 2018)                                            |
| Global                  | Aircraft measurement, HIPPO and Atom campaign      | 1-10 ng rBC/kg air in the upper troposphere, 0.5-2 ng rBC/kg in the lower stratosphere                            | -                                                                                 | -    | -                                                                          | (Katich et al., 2018;Schwarz et al., 2013;Schwarz et al., 2017) |

**Table S3 Brief summarize of the instruments in the moveable container**

| Instruments                                     | Abbreviation | Manufactory                      | Measuring parameters                         | Resolution      | Data process                                                                                         |
|-------------------------------------------------|--------------|----------------------------------|----------------------------------------------|-----------------|------------------------------------------------------------------------------------------------------|
| Single particle soot photometer                 | SP2          | Droplet measurement technologies | BC concentration<br>MMD<br>$D_p/D_c$         | Single particle | Calculating the average properties of all observed particles in a certain time window (1 min or 1 h) |
| Photoacoustic extinctionsmeter                  | PAX          | Droplet measurement technologies | $PM_{2.5} b_{sca} (\lambda= 870 \text{ nm})$ | 1 second        | Averaged (Arithmetic mean in 1 min) to 1 min                                                         |
| Aethalometer                                    | AE33         | Magee Scientific Corp.           | $b_{abs} (\lambda= 880 \text{ nm})$          | 1 second        | Averaged (Arithmetic mean in 1 min) to 1 min                                                         |
| 49i O <sub>3</sub> analyzer                     |              | Thermo Scientific                | O <sub>3</sub> concentration                 | 1 second        | Averaged (Arithmetic mean in 1 min) to 1 min                                                         |
| 42i NO-NO <sub>2</sub> -NO <sub>x</sub> analyze |              | Thermo Scientific                | NO and NO <sub>2</sub> concentration         | 1 second        | Averaged (Arithmetic mean in 1 min) to 1 min                                                         |
| 48i CO analyzer                                 |              | Thermo Scientific                | CO concentration                             | 1 second        | Averaged (Arithmetic mean in 1 min) to 1 min                                                         |

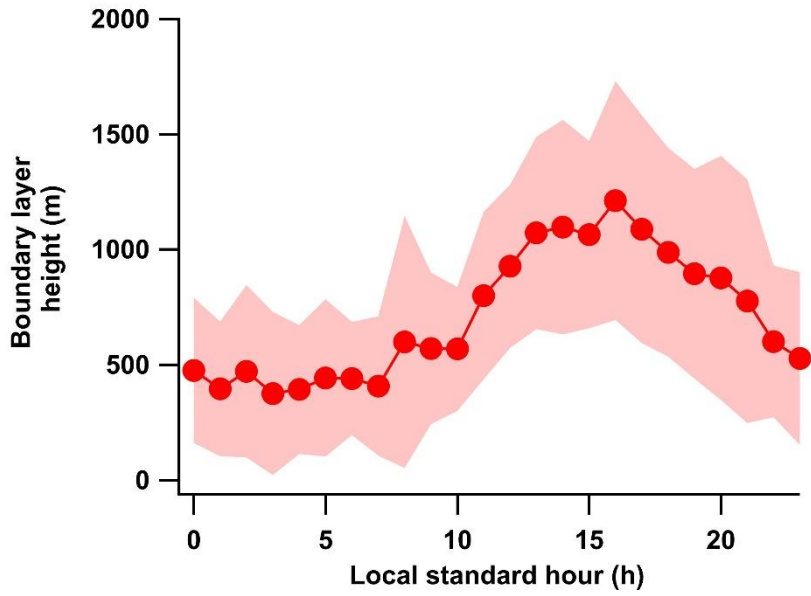

Figure. S1 Diurnal variation of BLH during the observation.

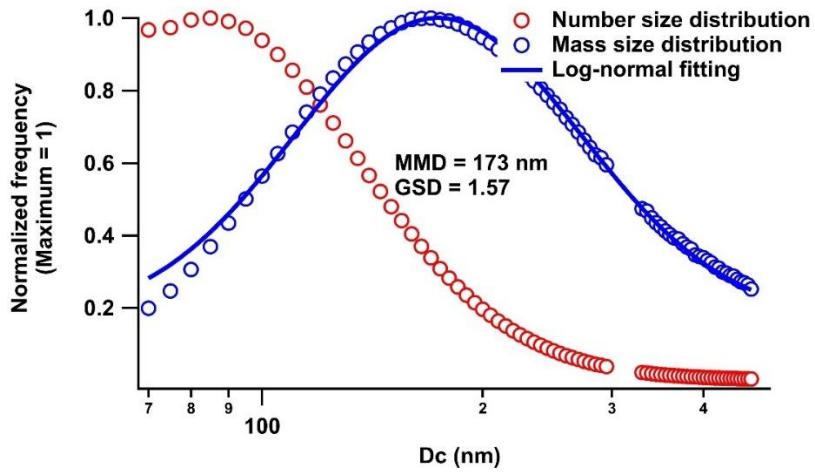

Figure. S2 Size distribution of BC core during the entire observation.

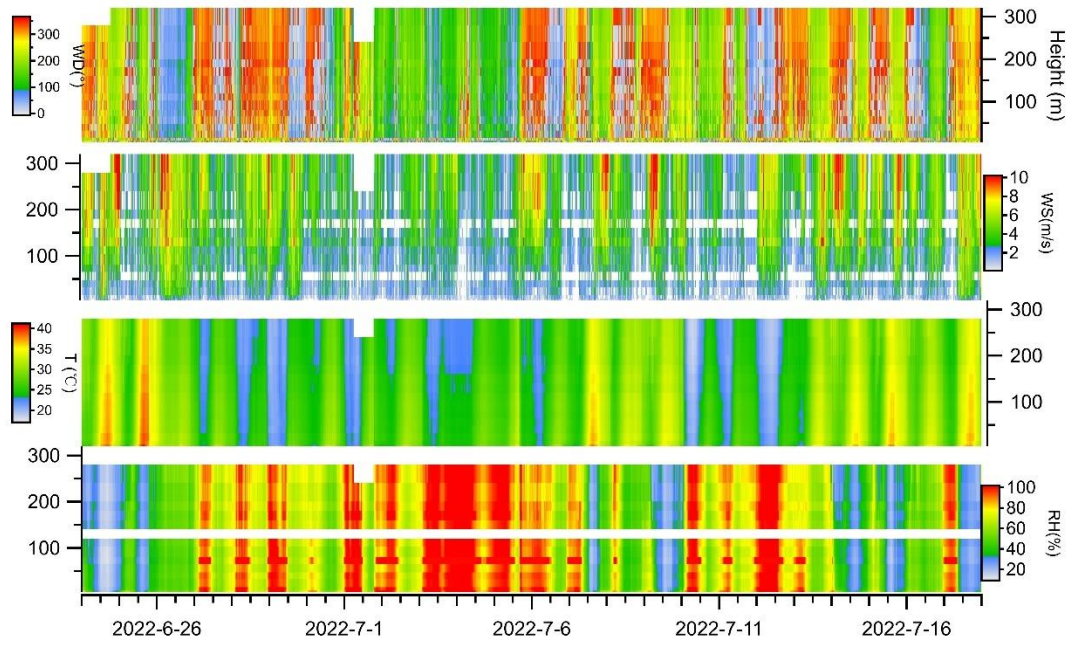

Figure. S3 Meteorology conditions (0-320 m) during the observation period.

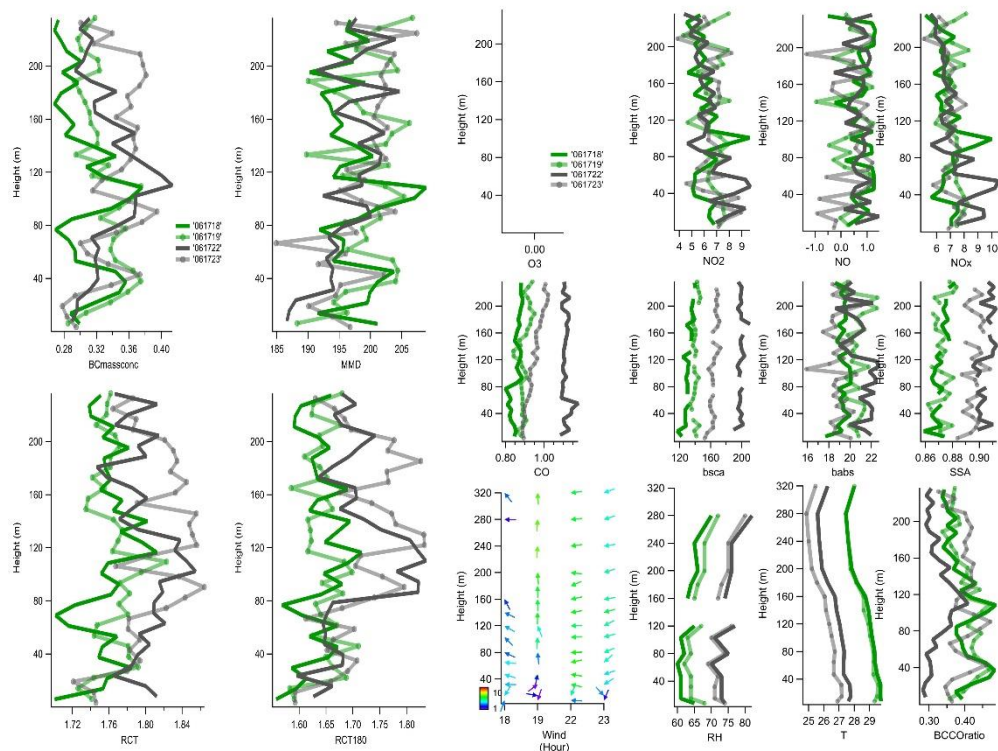

Figure S4 Vertical profiles during 17<sup>th</sup> June. RCT denotes  $D_p/D_c$  and RCT180 denotes the  $D_p/D_c$  for BC with  $D_c = 180 \pm 10$  nm.

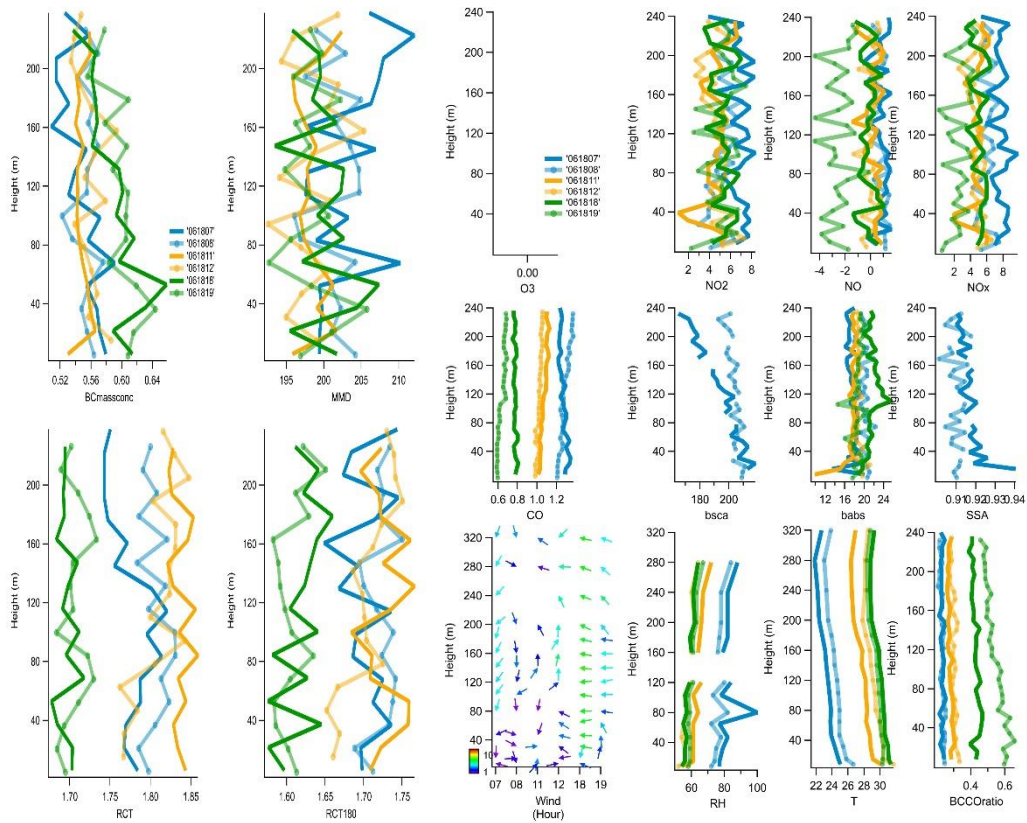

Figure S5 Vertical profiles during 18<sup>th</sup> June

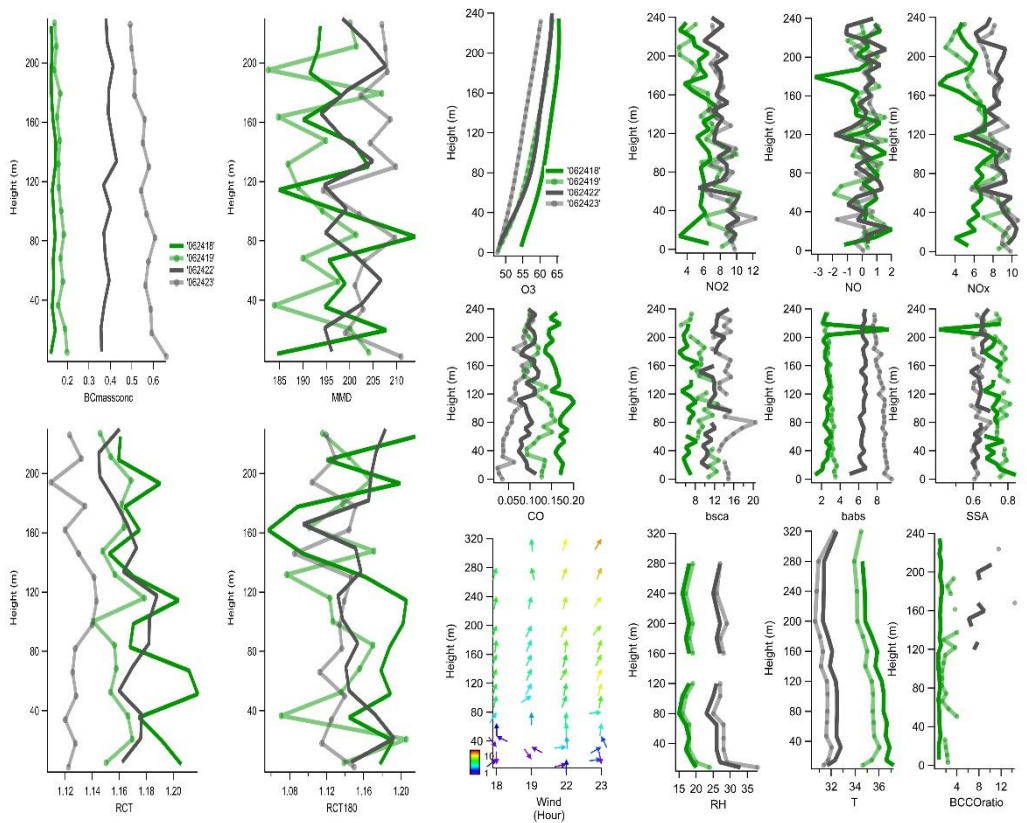

Figure S6 Vertical profiles during 24<sup>th</sup> June



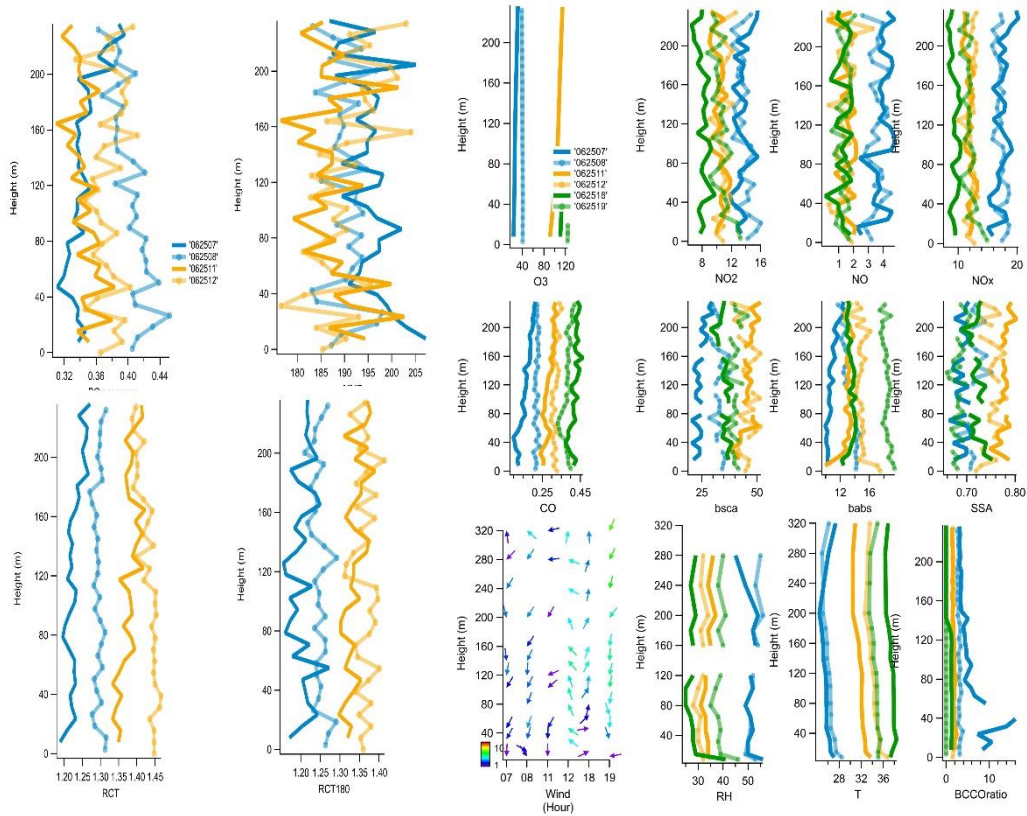

Figure S7 Vertical profiles during 25<sup>th</sup> June

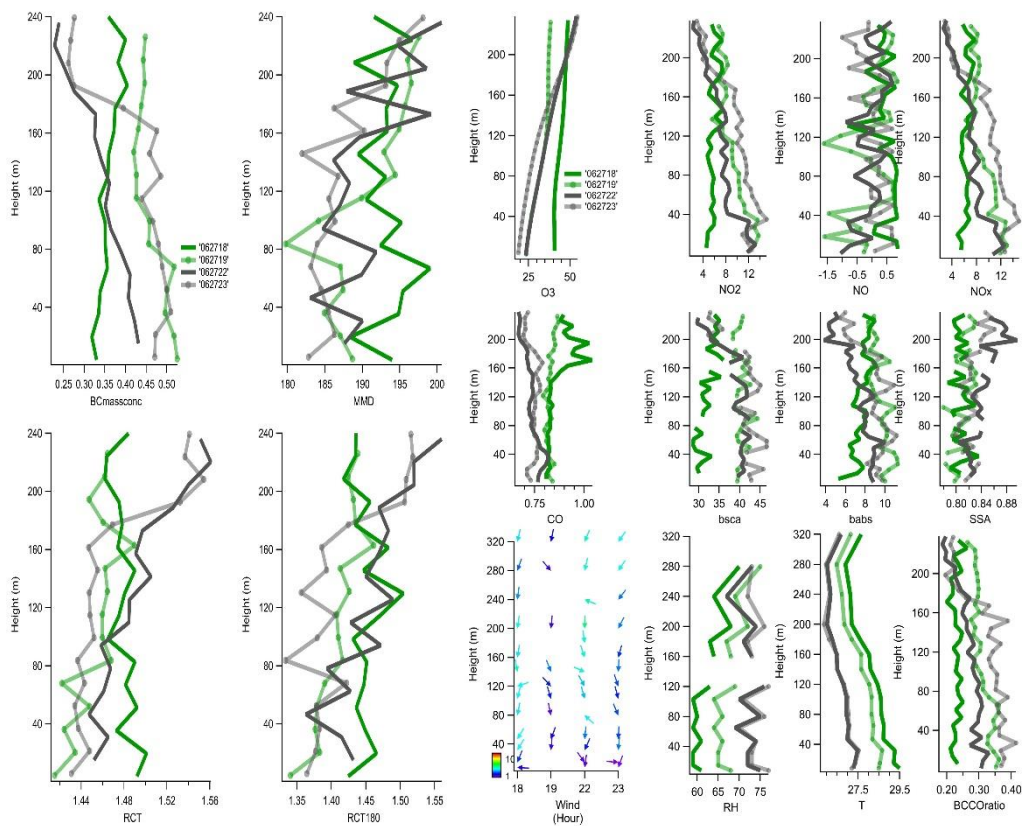

Figure S8 Vertical profiles during 27<sup>th</sup> June

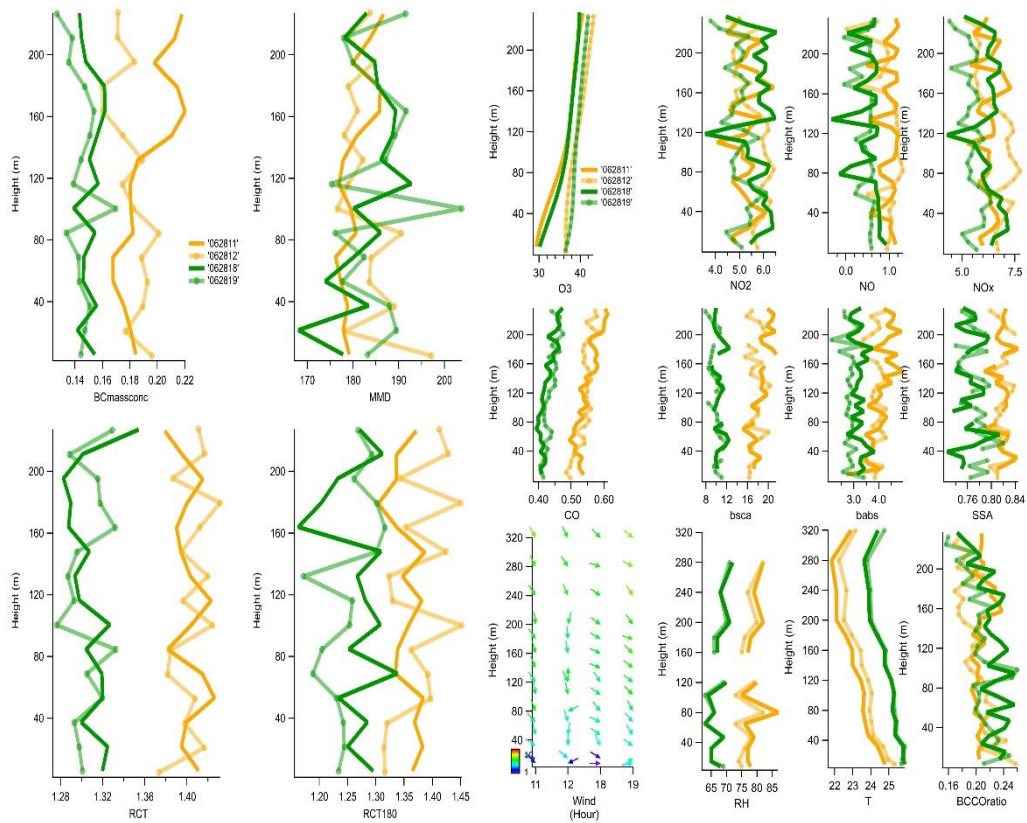

Figure S9 Vertical profiles during 28<sup>th</sup> June

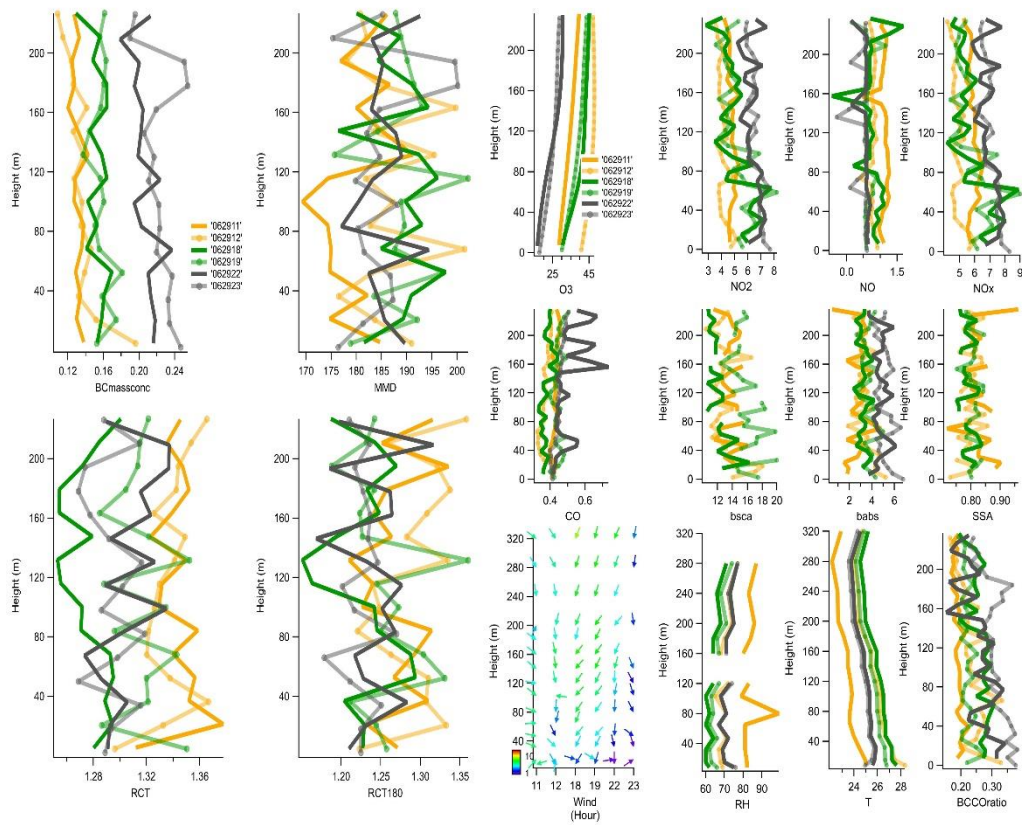

Figure S10 Vertical profiles during 29<sup>th</sup> June

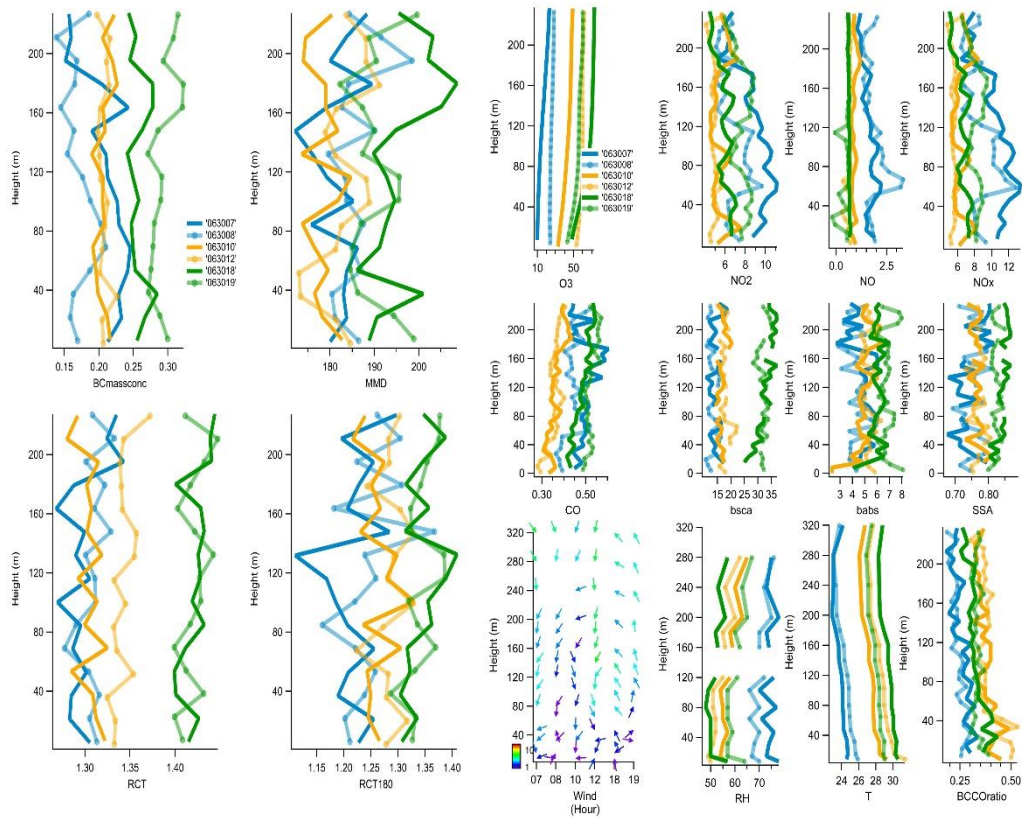

Figure S11 Vertical profiles during 30<sup>th</sup> June

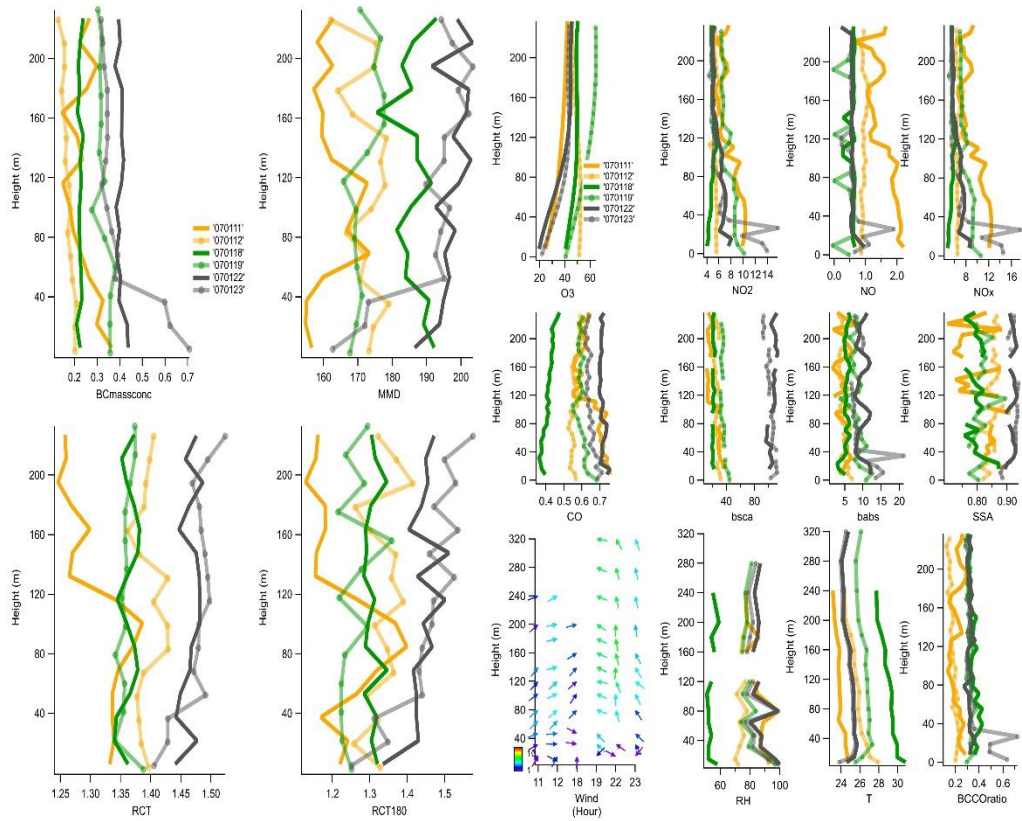

Figure S12 Vertical profiles during 1<sup>st</sup> July

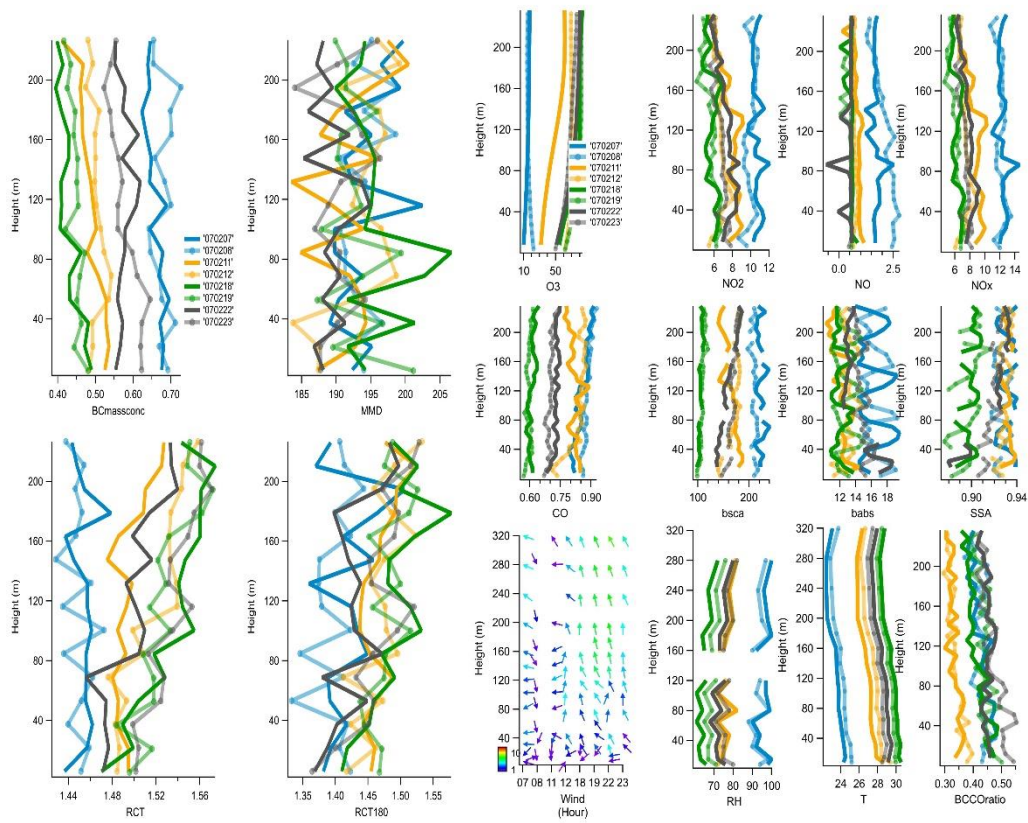

**Figure S13 Vertical profiles during 2<sup>nd</sup> July**

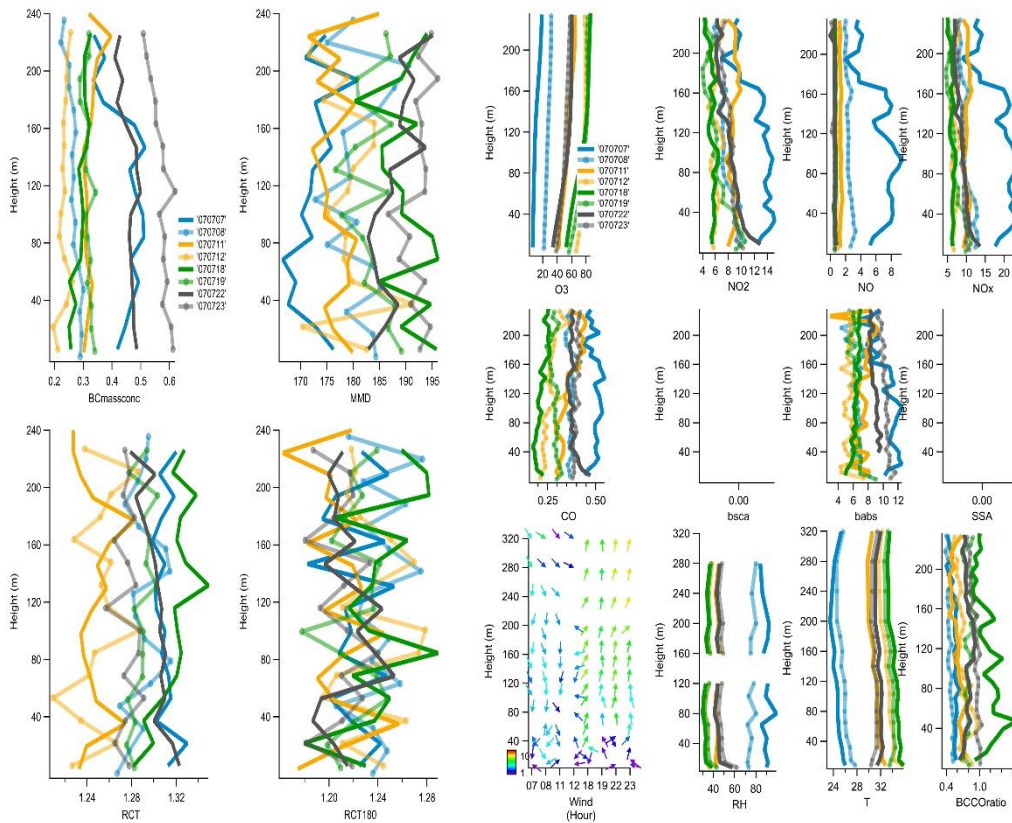

**Figure S14 Vertical profiles during 3<sup>rd</sup> July**

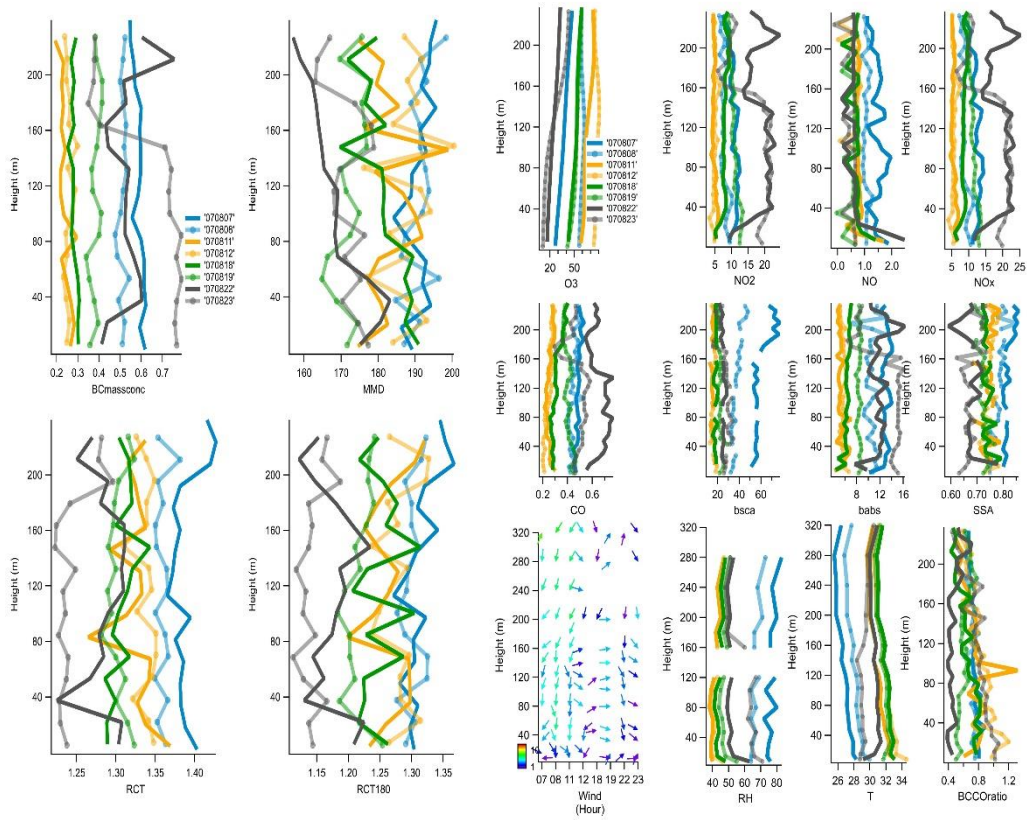

Figure S15 Vertical profiles during 8<sup>th</sup> July

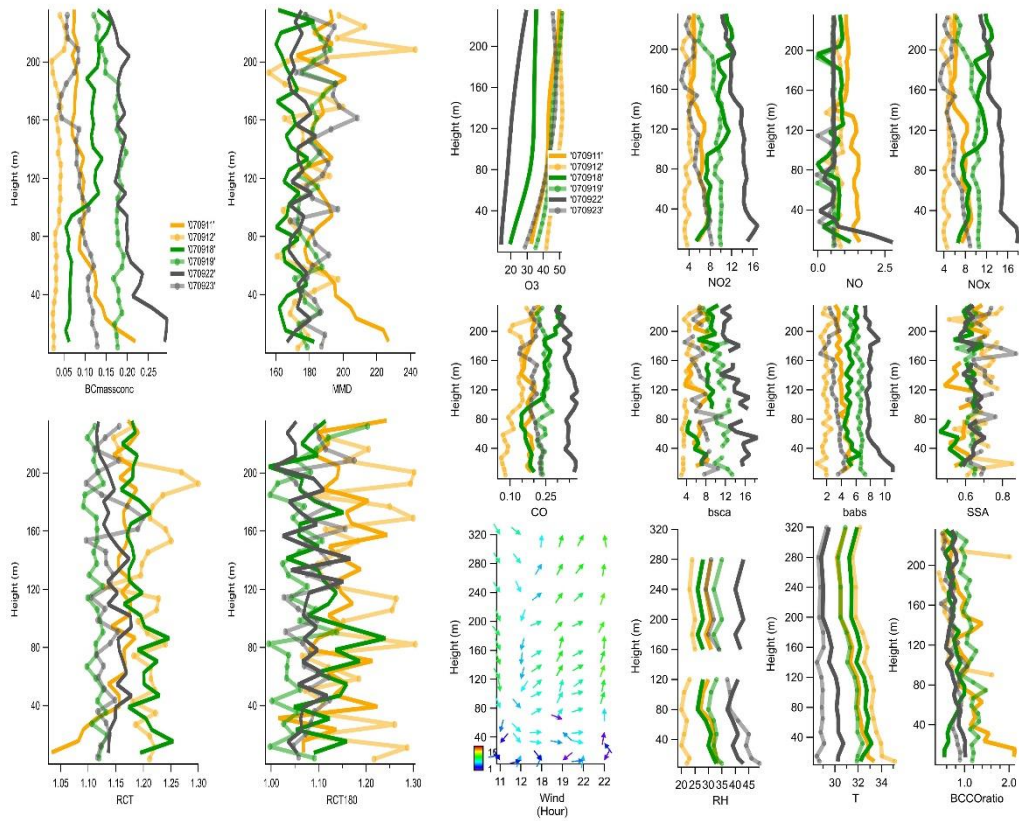

Figure S16 Vertical profiles during 9<sup>th</sup> July

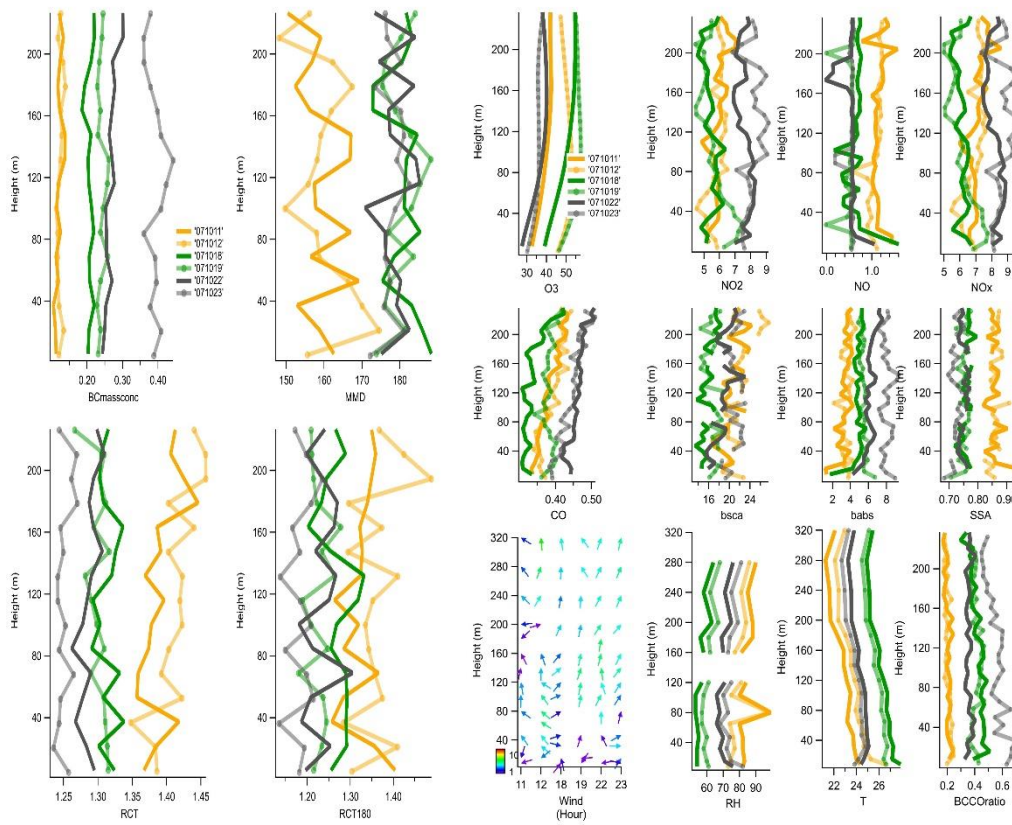

**Figure S17 Vertical profiles during 10<sup>th</sup> July**

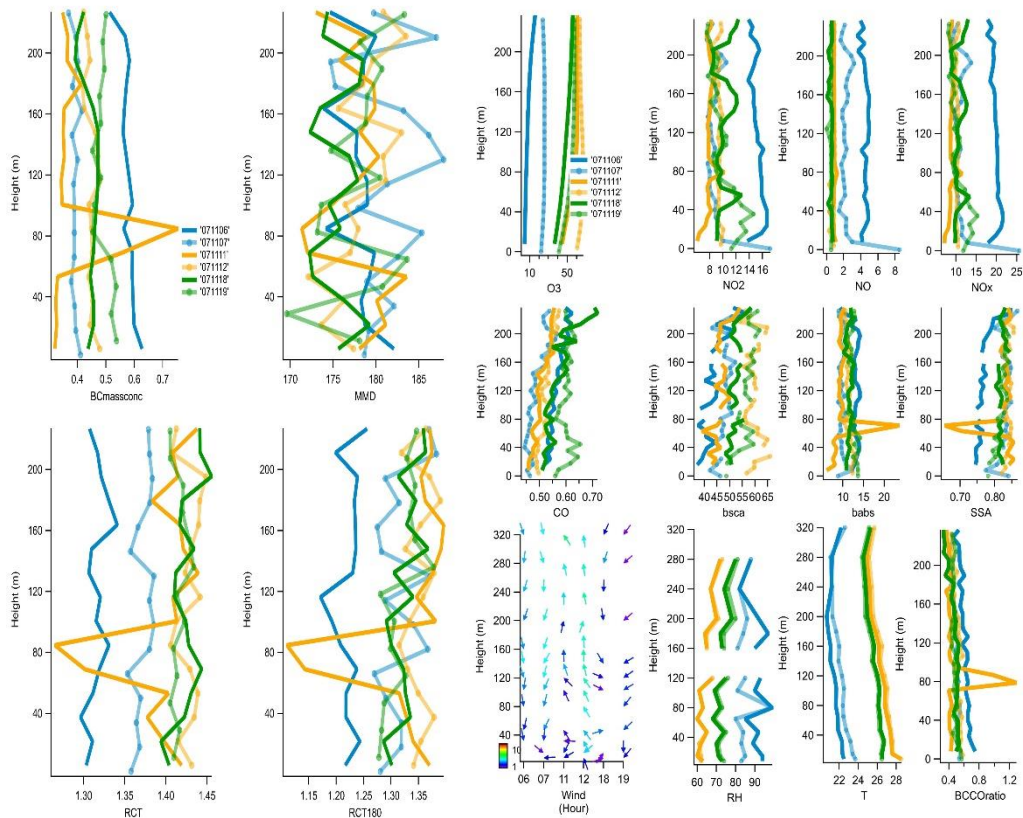

**Figure S18 Vertical profiles during 11<sup>th</sup> July**

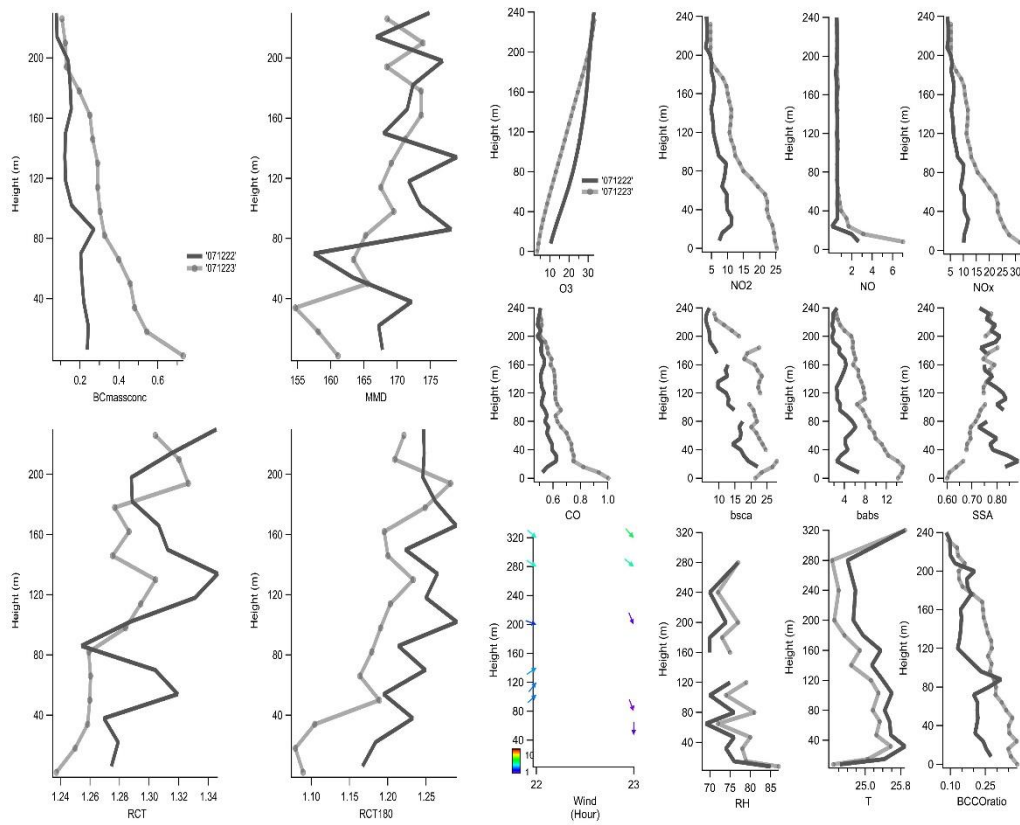

Figure S19 Vertical profiles during 12<sup>th</sup> July

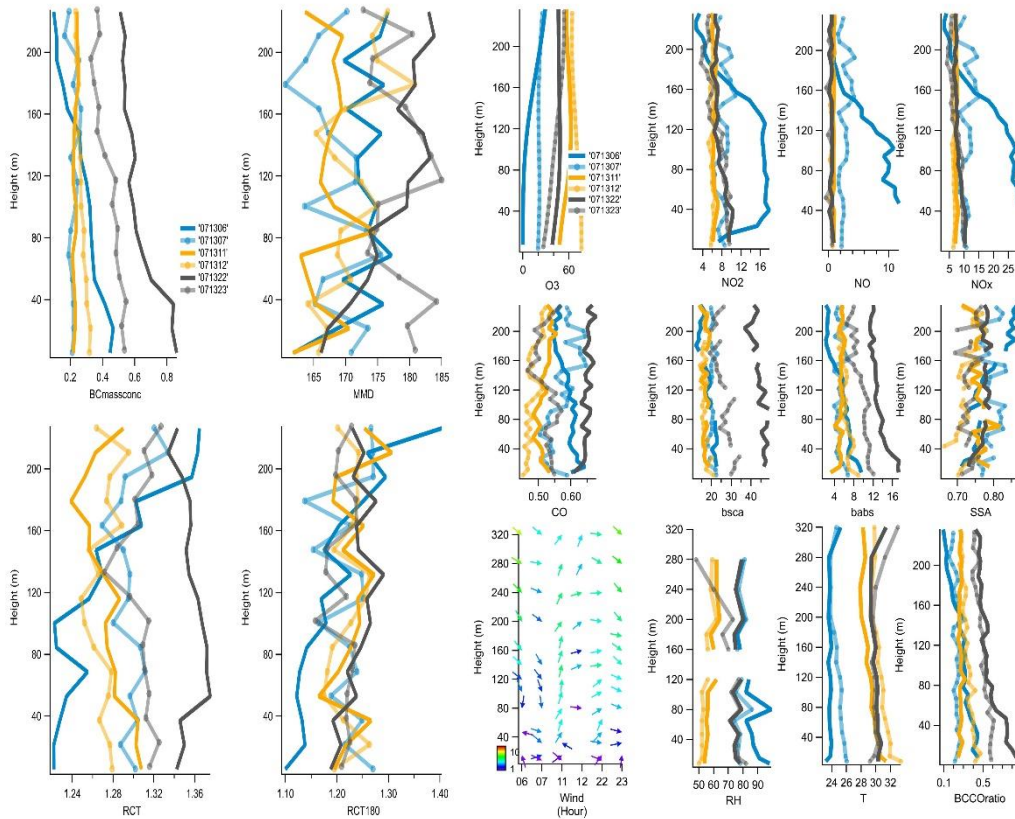

Figure S20 Vertical profiles during 13<sup>th</sup> July

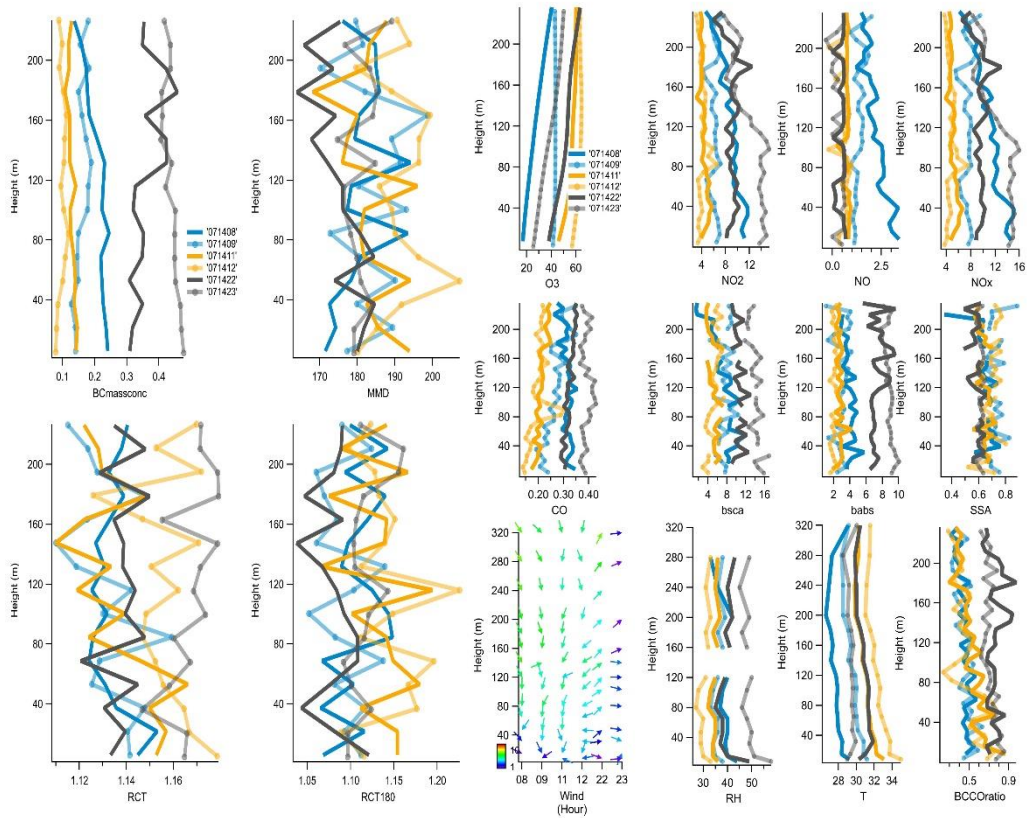

Figure S21 Vertical profiles during 14<sup>th</sup> July

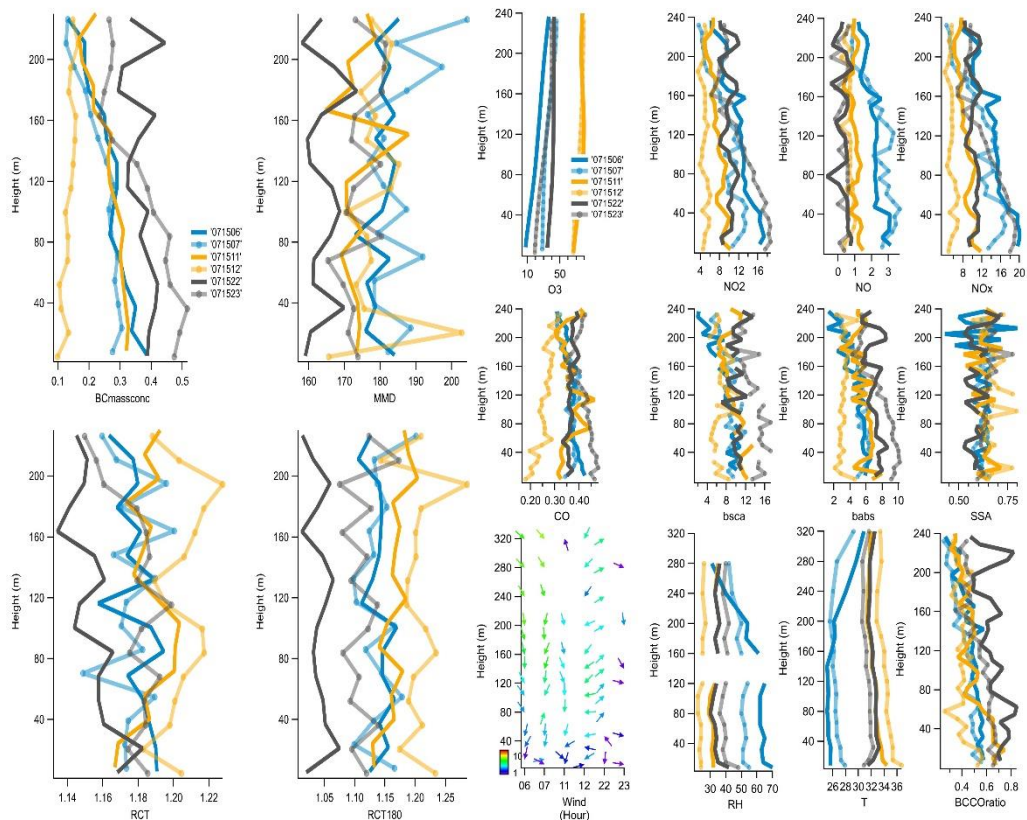

Figure S22 Vertical profiles during 15<sup>th</sup> July



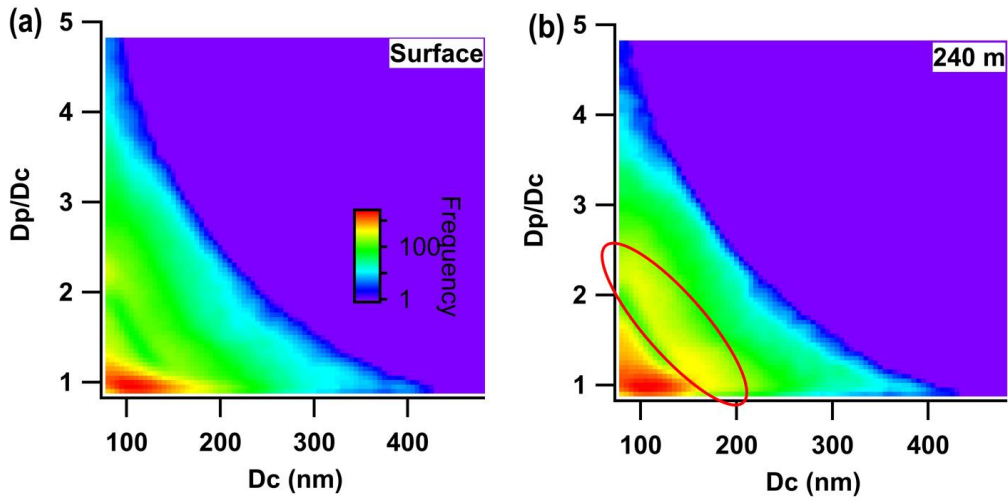

Figure S23 The size-resolved  $D_p/D_c$  at 23:00 27<sup>th</sup> June. (a) the surface level, (b) the 240 m level.

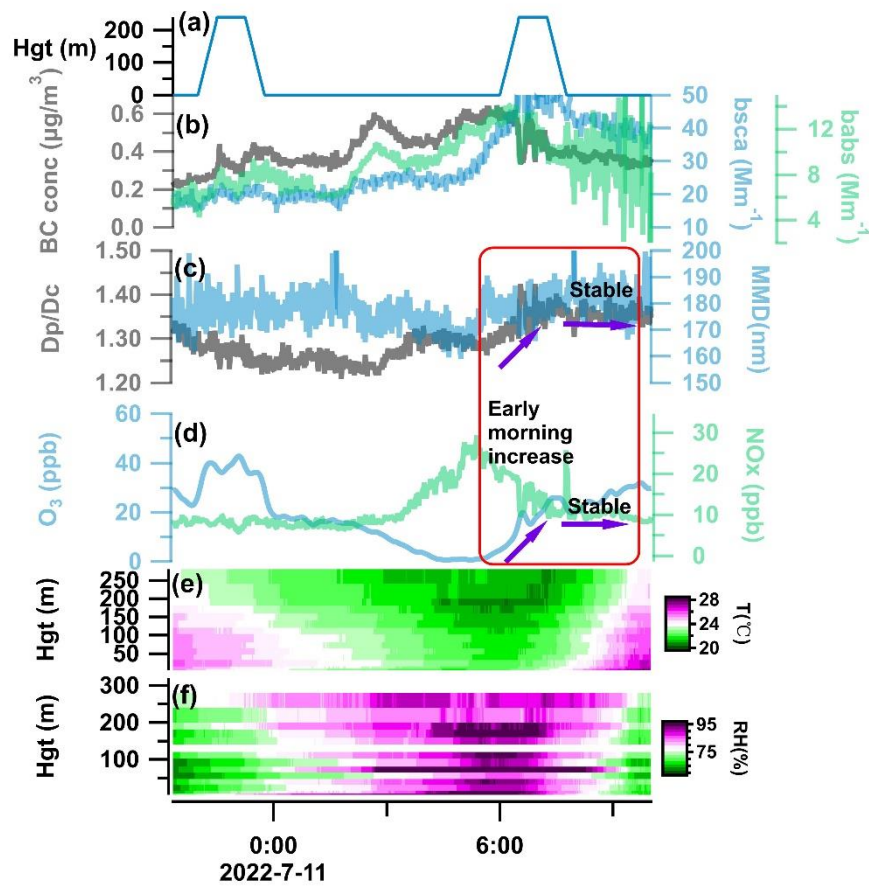

Figure S24 Another case of vertical mixing leading to the increase of  $O_3$  and  $D_p/D_c$  in the morning.

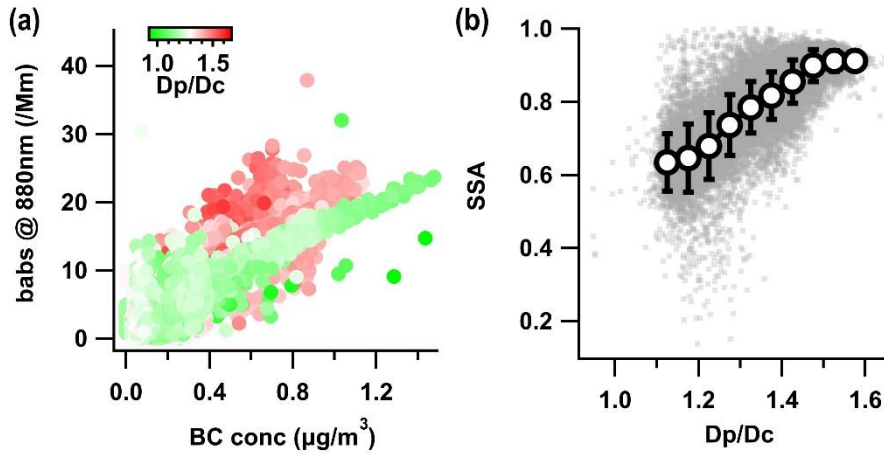

Figure S25 (a)The relationship between BC concentration and  $b_{\text{abs}}$ . (b)The relationship between SSA and  $D_p/D_c$ .

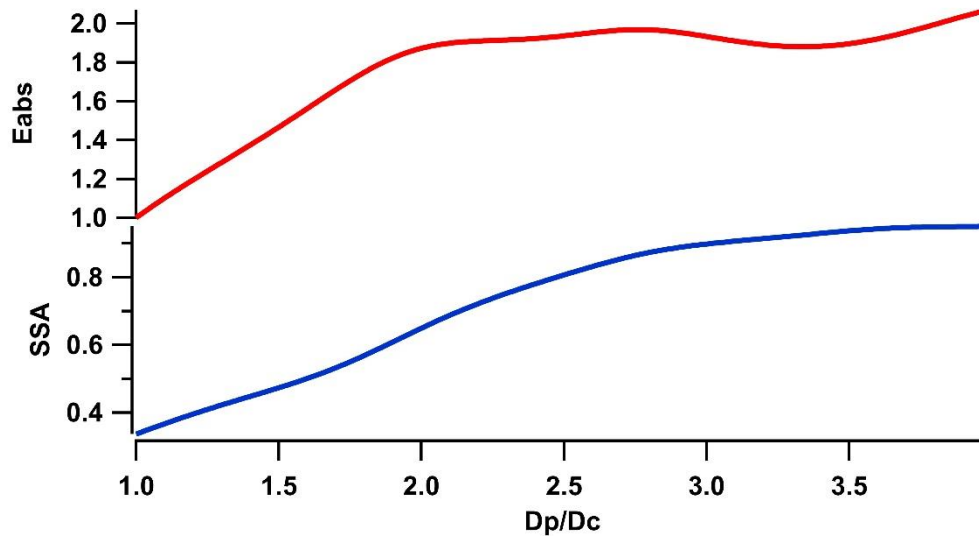

Figure S26 The variation of  $E_{\text{abs}}$  and SSA with  $D_p/D_c$  for BC-containing particles with  $D_c=170$  nm through Mie-theory.

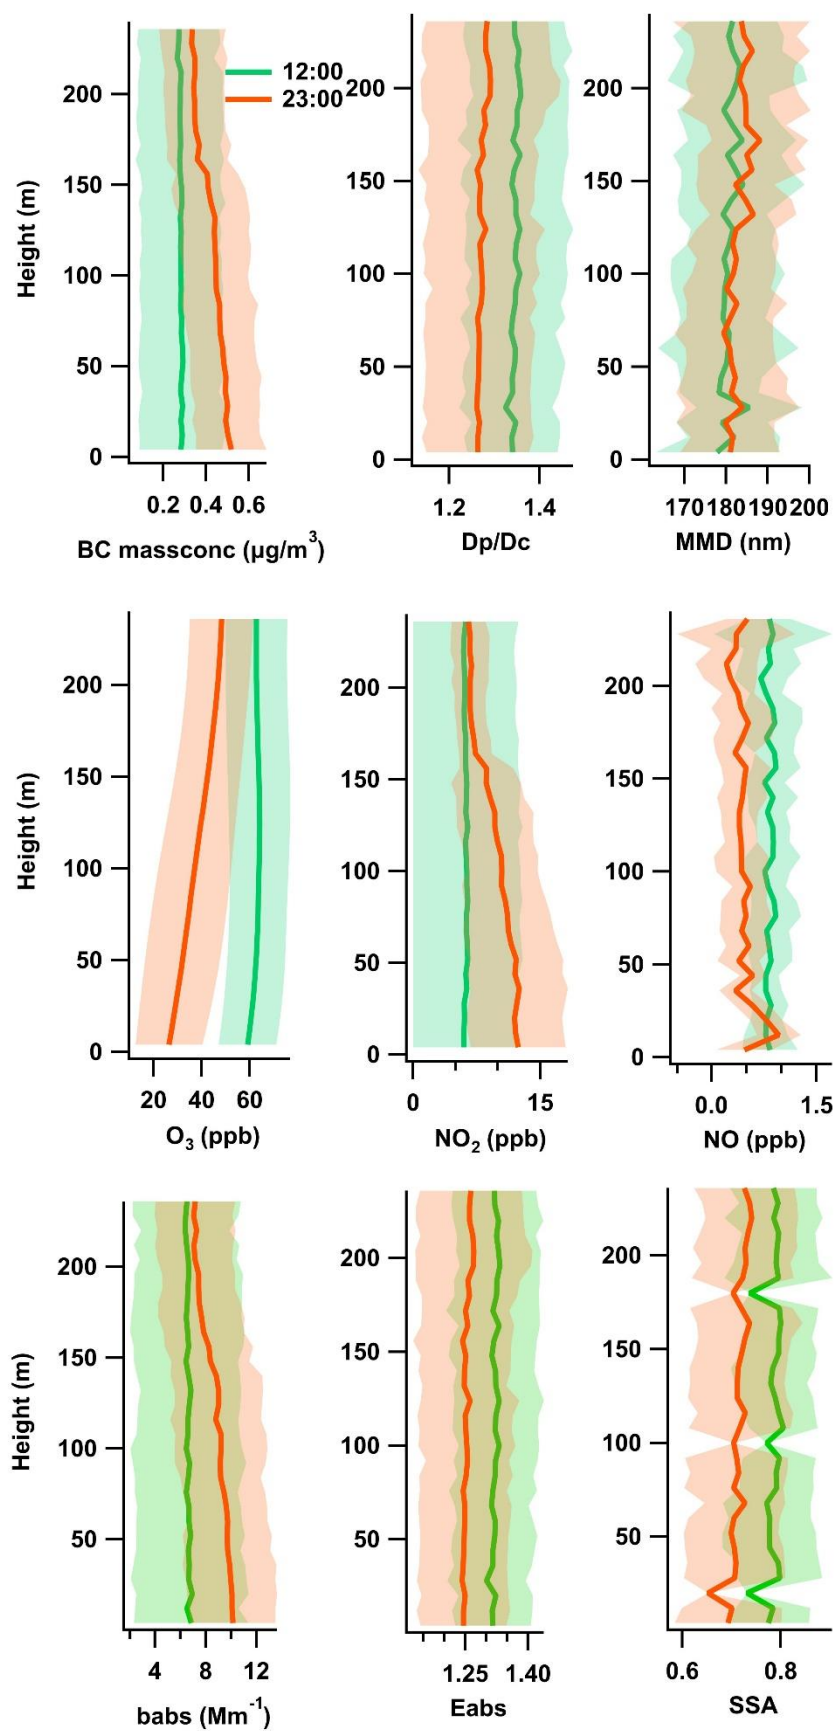

Figure S27 The same as Fig. 4 but with error bars.

## References

- Ding, S., Liu, D. T., Zhao, D. L., Hu, K., Tian, P., Zhou, W., Huang, M. Y., Yang, Y., Wang, F., Sheng, J. J., Liu, Q., Kong, S. F., Cui, P. Y., Huang, Y. D., He, H., Coe, H., and Ding, D. P.: Size-Related Physical Properties of Black Carbon in the Lower Atmosphere over Beijing and Europe, *Environ Sci Technol*, 53, 11112-11121, 10.1021/acs.est.9b03722, 2019.
- Ditas, J., Ma, N., Zhang, Y., Assmann, D., Neumaier, M., Riede, H., Karu, E., Williams, J., Scharffe, D., Wang, Q. Q., Saturno, J., Schwarz, J. P., Katich, J. M., McMeeking, G. R., Zahn, A., Hermann, M., Brenninkmeijer, C. A. M., Andreae, M. O., Poschl, U., Su, H., and Cheng, Y. F.: Strong impact of wildfires on the abundance and aging of black carbon in the lowermost stratosphere, *P Natl Acad Sci USA*, 115, E11595-E11603, 10.1073/pnas.1806868115, 2018.
- Katich, J. M., Samset, B. H., Bui, T. P., Dollner, M., Froyd, K. D., Campuzano-Jost, P., Nault, B. A., Schroder, J. C., Weinzierl, B., and Schwarz, J. P.: Strong Contrast in Remote Black Carbon Aerosol Loadings Between the Atlantic and Pacific Basins, *J. Geophys. Res.-Atmos.*, 123, 13386-13395, 10.1029/2018jd029206, 2018.
- Schulz, H., Zanatta, M., Bozem, H., Leaitch, W. R., Herber, A. B., Burkart, J., Willis, M. D., Kunkel, D., Hoor, P. M., Abbatt, J. P. D., and Gerdes, R.: High Arctic aircraft measurements characterising black carbon vertical variability in spring and summer, *Atmospheric Chemistry and Physics*, 19, 2361-2384, 10.5194/acp-19-2361-2019, 2019.
- Schwarz, J. P., Samset, B. H., Perring, A. E., Spackman, J. R., Gao, R. S., Stier, P., Schulz, M., Moore, F. L., Ray, E. A., and Fahey, D. W.: Global-scale seasonally resolved black carbon vertical profiles over the Pacific, *Geophysical Research Letters*, 40, 5542-5547, 10.1002/2013gl057775, 2013.
- Schwarz, J. P., Weinzierl, B., Samset, B. H., Dollner, M., Heimerl, K., Markovic, M. Z., Perring, A. E., and Ziemba, L.: Aircraft measurements of black carbon vertical profiles show upper tropospheric variability and stability, *Geophysical Research Letters*, 44, 1132-1140, 10.1002/2016gl071241, 2017.
- Zhao, D. L., Liu, D. T., Yu, C. J., Tian, P., Hu, D. W., Zhou, W., Ding, S., Hu, K., Sun, Z. B., Huang, M. Y., Huang, Y., Yang, Y., Wang, F., Sheng, J. J., Liu, Q., Kong, S. F., Li, X. M., He, H., and Ding, D. P.: Vertical evolution of black carbon characteristics and heating rate during a haze event in Beijing winter, *Sci Total Environ*, 709, ARTN 136251, 10.1016/j.scitotenv.2019.136251, 2020.
